# Supplementary material
Source: HighWire-hosted journal article supplement (https://diabetes.diabetesjournals.org/content/suppl/2007/03/26/db06-1540)
Supplement: Supplementary_Table_2.pdf [file Supplementary_Table_2.pdf]

**Table 2.****Oligonucleotide sequences and PCR amplification conditions for *ABCC8* sequencing.**

| Exon  | Forward primer<br>5' to 3' | Reverse primer<br>5' to 3' | Fragment length<br>(bp) | Annealing T<br>(°C) |
|-------|----------------------------|----------------------------|-------------------------|---------------------|
| 1     | GCTGCAAGGGACAGAGGC         | CTCTTGGCCCTGCAGAAGC        | 501                     | 64                  |
| 2     | GGCTGAATGAGTTGGACGTT       | TAGGATCTCCTTGGGCCTTT       | 384                     | 60                  |
| 3     | TACCCCAAATACGCCCATTA       | CTCCATGAAGGCAGGGATT        | 418                     | 60                  |
| 4     | GGCACGCTTATTCTGTCTCC       | CTCAGTTTGGCTGAGAAGCA       | 374                     | 60                  |
| 5     | GGGAGTGGTGAGAAGTTGGA       | AGTGGGGTCACTTCCCTTCT       | 585                     | 61                  |
| 6     | TGTGCACTTGCTGATTCCA        | TCTGTGGTGGGGATACTGC        | 504                     | 60                  |
| 7     | CAAGCCCAGAGGGTCTTGT        | CATCGTTAATGGGCAACAAA       | 416                     | 60                  |
| 8     | CACCATGGGGACTGTCTGA        | GCAAGCATGGAGTGGAAGA        | 375                     | 60                  |
| 09-10 | ACTCTAGGGGACTGGGGAAA       | ATCTCAAGGCCTCTGCTTC        | 798                     | 62                  |
| 11    | GAAGTGCCACAGGGCTAGAG       | CTGTGCAGAAAGGCCAAATC       | 290                     | 62                  |
| 12    | CTGACAGCCCTCTCATTTC        | ATGTCCCTCTGACCAACCAG       | 402                     | 62                  |
| 13-14 | TGTGGGCTTTGTGGGACTAT       | GGTCCCTGGTTTCTGGACTC       | 658                     | 62                  |
| 15    | GTCAGCATGAGAAGGCCAGT       | CCAGGGCATAACCAAGAAT        | 364                     | 60                  |
| 16    | GAGGACTTGCTGGGGATTCT       | GAGTGGGCCCTCCAATAAAT       | 344                     | 60                  |
| 17    | GGGATTGCTTCTCCCCTAAG       | CCTTAGCCCCATGTCTCTGA       | 265                     | 62                  |
| 18    | CCCCTCTCCACACCTCTCT        | GGTGATGTGGCTCCCTTG         | 274                     | 62                  |
| 19    | TGAGCCATCAGCTTGACAAC       | CTGGCCAGAGACAGTTCCTC       | 240                     | 60                  |
| 20    | TTCAAGCTCACACGGTGTTC       | CAGGCAACTCTTCAGCCTTC       | 369                     | 60                  |
| 21    | AGGTGAGAAGCAGGCAAAGA       | GCCTGCCTCAGTTTCCCTAT       | 382                     | 60                  |
| 22    | GAGTTGTCCAAAGCCACACA       | GCATAAAGCCATCCAGTGCT       | 422                     | 60                  |
| 23    | ATCAATACCAGCCCCTTGC        | GGGCACTAAGGACAGGAAGA       | 374                     | 60                  |
| 24    | CCTGGCAAGATGAATGTGTG       | CCCCTTACTGAGGGGACAA        | 422                     | 60                  |
| 25-26 | AAATGGCTTCCCTCTGTGTG       | TTTCTCCCTGCTTCTGCAC        | 795                     | 60                  |
| 27    | CCAGACCCATGAATGACTCC       | TTATAATCGGATCGGGGACA       | 326                     | 60                  |
| 28    | GATTACGCTGCTGCACTCAA       | GGAGGGAACACGACCCTATT       | 419                     | 60                  |
| 29    | TGCTCACAAAAGCTCAATGG       | AGGCAGCTTGAGAGAGAACG       | 533                     | 60                  |
| 30    | GGGATTCTGGACAGGTTTGA       | GGGATTCTGGACAGGTTTGA       | 478                     | 60                  |
| 31    | TGTGTGTCTGGTGACGTGTG       | GGTAAGGCCTGGGAGTGTCT       | 355                     | 60                  |
| 32    | ACATGACTGACCCTCCCTGT       | CCCAACCCAGACACACTCCT       | 353                     | 62                  |
| 33    | CCAAGGAGGAGTGTGTCTGG       | CAGGAGACTGCGATGTCTGAA      | 384                     | 62                  |
| 34    | CTGTGACCTCCACACCTG         | GGCCTCCTGTCTATGTCTGA       | 267                     | 62                  |
| 35    | ACGTGGTCAGACATGACAGG       | TGGGGGACAGCATCTTAGAC       | 376                     | 61                  |
| 36    | GCCAGACCTCCAACCTCAGTC      | GGCCCCCGTATAGTGAGAAG       | 412                     | 62                  |
| 37    | GCCTCCACATTGTTGTGTCA       | TGCAAATTTCTCCCTAGC         | 385                     | 62                  |
| 38    | ACTAGGATCGGGGTCAGATG       | GATTACTGGGACCAGGCAAG       | 285                     | 62                  |
| 39    | CCTCATCCTCCTCCTCCAAG       | AACCCAGGCAGGGGTATG         | 301                     | 62                  |
